# Supplementary material for: Quantification of plaque area and characterization of plaque biochemical composition with atherosclerosis progression in ApoE/LDLR−/− mice by FT-IR imaging
Source: Royal Society of Chemistry journal article supplement (doi:10.1039/c3an01050c), 2013-01-01
Supplement: c3an01050c.pdf [file c3an01050c.pdf]

Electronic Supplementary Information (ESI)

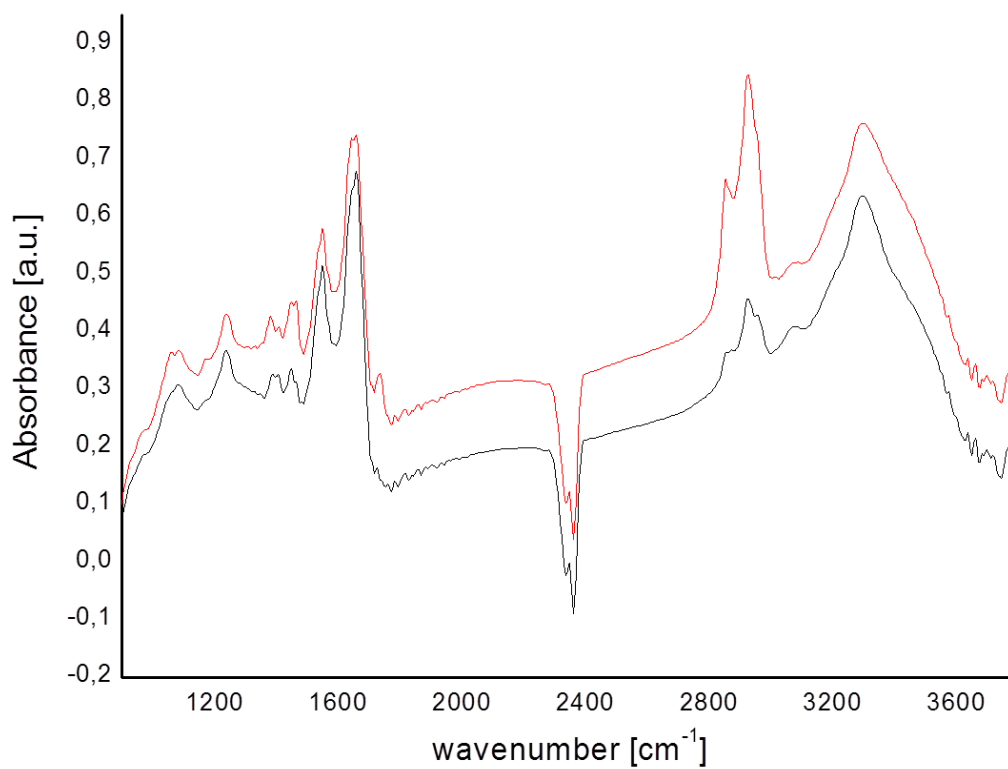

Fig 1S. SM1. The exemplary average spectra in the full range of classes obtained from HCA in the 2800-3025 cm<sup>-1</sup>, for 4-months old mouse: the atherosclerotic plaque (red ) and aortic wall (black).
